# Supplementary material for: Antagonism between killer yeast strains as an experimental model for biological nucleation dynamics
Source: eLife journal article supplement (doi:10.7554/elife.62932), 2021-12-06
Supplement: supp [file elife-62932-supp-v1.zip]

Archive with 20 entries (20 files):
- elife_poa_e62932_Transparent_Reporting_File.pdf
- elife_poa_e62932_Figure_2_source_data_1.xlsx
- elife_poa_e62932_Figure_3_source_data_1.xlsx
- elife_poa_e62932_Figure_4_source_data_1.xlsx
- elife_poa_e62932_Figure_5_source_data_1.xlsx
- elife_poa_e62932_Figure_6_source_data_1.xlsx
- elife_poa_e62932_Figure_3_figure_supplement_1.pdf
- elife_poa_e62932_Figure_3_figure_supplement_2.pdf
- elife_poa_e62932_Figure_5_figure_supplement_1.pdf
- elife_poa_e62932_Figure_5_figure_supplement_2.pdf
- elife_poa_e62932_Figure_5_figure_supplement_3.pdf
- elife_poa_e62932_Figure_5_figure_supplement_4.pdf
- elife_poa_e62932_Figure_5_figure_supplement_5.pdf
- elife_poa_e62932_Figure_6_figure_supplement_1.pdf
- elife_poa_e62932_Figure_6_figure_supplement_2.pdf
- elife_poa_e62932_Figure_6_figure_supplement_3.pdf
- elife_poa_e62932_Figure_7_figure_supplement_1.pdf
- elife_poa_e62932_Figure_7_figure_supplement_2.pdf
- elife_poa_e62932_Figure_7_figure_supplement_3.pdf
- elife_poa_e62932_Figure_7_figure_supplement_4.pdf
