# Supplementary material for: Antagonism between killer yeast strains as an experimental model for biological nucleation dynamics
Source: eLife journal article supplement (doi:10.7554/elife.62932), 2021-12-06
Supplement: supp [file elife-62932-supp-v1.zip › elife_poa_e62932_Figure_2_source_data_1.xlsx]

## Sheet: K1 vs S2
Galactose concentration:	360 uM
Copper concentration	0 uM
Competition: K1 vs S2
Shown are K1 frequencies
Replica / Time	14 h	26 h	38 h
1	0.515642	0.66142	0.910675
2	0.494211	0.668723	0.923853
3	0.484462	0.69186	0.935739
Galactose concentration:	320 uM
Copper concentration	0 uM
Competition: K1 vs S2
Shown are K1 frequencies
Replica / Time	14 h	26 h	38 h
1	0.46263	0.574074	0.782371
2	0.482289	0.56448	0.802283
3	0.471116	0.568441	0.807784
Galactose concentration:	280 uM
Copper concentration	0 uM
Competition: K1 vs S2
Shown are K1 frequencies
Replica / Time	14 h	26 h	38 h
1	0.470286	0.521728	0.625936
2	0.522348	0.525752	0.663077
3	0.499449	0.529667	0.659547
Galactose concentration:	240 uM
Copper concentration	0 uM
Competition: K1 vs S2
Shown are K1 frequencies
Replica / Time	14 h	26 h	38 h
1	0.511458	0.501355	0.589123
2	0.492039	0.479661	0.58007
Galactose concentration:	200 uM
Copper concentration	0 uM
Competition: K1 vs S2
Shown are K1 frequencies
Replica / Time	14 h	26 h	38 h
1	0.480541	0.499389	0.541685
2	0.50689	0.512227	0.533553
Galactose concentration:	0 uM
Copper concentration	0 uM
Competition: K1 vs S2
Shown are K1 frequencies
Replica / Time	14 h	26 h	38 h
1	0.479571	0.451983	0.506064
2	0.489515	0.497514	0.511961

## Sheet: K2 vs S1
Galactose concentration:	0 uM
Copper concentration	50 uM
Competition: K2 vs S1
Shown are K2 frequencies
Replica / Time	14 h	26 h	38 h
1	0.527317	0.67609	0.89608
2	0.517791	0.681569	0.891591
3	0.519728	0.68015	0.897001
Galactose concentration:	0 uM
Copper concentration	25 uM
Competition: K2 vs S1
Shown are K2 frequencies
Replica / Time	14 h	26 h	38 h
1	0.531212	0.653404	0.870621
2	0.543081	0.653497	0.871553
3	0.545143	0.656308	0.876174
Galactose concentration:	0 uM
Copper concentration	12.5 uM
Competition: K2 vs S1
Shown are K2 frequencies
Replica / Time	14 h	26 h	38 h
1	0.540834	0.622916	0.825478
2	0.535754	0.636532	0.833829
Galactose concentration:	0 uM
Copper concentration	0 uM
Competition: K2 vs S1
Shown are K2 frequencies
Replica / Time	14 h	26 h	38 h
1	0.553635	0.55635	0.689213
2	0.549909	0.540741	0.696027
3	0.523935	0.563293	0.693702

## Sheet: K2b vs S1
Galactose concentration:	0 uM
Copper concentration	50 uM
Competition: K2b vs S1
Shown are K2b frequencies
Replica / Time	14 h	26 h	38 h
1	0.528846	0.574718	0.73425
2	0.515216	0.582465	0.706694
3	0.509677	0.566659	0.704258
4	0.52112	0.575455	0.723121
5	0.522714	0.571531	0.712704
Galactose concentration:	0 uM
Copper concentration	5 uM
Competition: K2b vs S1
Shown are K2b frequencies
Replica / Time	14 h	26 h	38 h
1	0.515861	0.551967	0.63503
2	0.517577	0.554195	0.652264
Galactose concentration:	0 uM
Copper concentration	0 uM
Competition: K2b vs S1
Shown are K2b frequencies
Replica / Time	14 h	26 h	38 h
1	0.530557	0.54386	0.608645
2	0.546456	0.539548	0.60129
3	0.51891	0.542977	0.585238
4	0.532058	0.550882	0.584315
5	0.511912	0.547525	0.594995

## Sheet: Interaction coefficients
Best-fit values of r1
Galactose concentration (uM)	Best fit estimate (1/h)	SD (1/h)
0	0.0054	0.0025
200	0.013	0.008
240	0.0198	0.0018
280	0.038	0.007
320	0.09	0.004
360	0.125	0.014
Best-fit values of r2
Copper concentration (uM)	Best fit estimate (1/h)	SD (1/h)
0	0.037	0.007
12.5	0.078	0.004
25	0.0917	0.0021
50	0.1087	0.0023
Best-fit values of r2b
Copper concentration (uM)	Best fit estimate (1/h)	SD (1/h)
0	0.021	0.005
12.5	0.039	0.0028
25	0.0588	0.0016
