# Supplementary material for: Antagonism between killer yeast strains as an experimental model for biological nucleation dynamics
Source: eLife journal article supplement (doi:10.7554/elife.62932), 2021-12-06
Supplement: supp [file elife-62932-supp-v1.zip › elife_poa_e62932_Figure_3_source_data_1.xlsx]

## Sheet: Fig. 3 panel A
Competition experiments initialized with same initial frequency for the two strains
Galactose concentration:	360 uM
Copper concentration	0 uM
Competition: K1 vs K2
Shown are K1 frequencies
Replica / Time	14 h	26 h	38 h
1	0.465422	0.582759	0.724125
2	0.458314	0.60878	0.812982
3	0.454723	0.62394	0.828908
4	0.471106	0.632891	0.880195
5	0.456553	0.583333	0.773951
6	0.487265	0.585406	0.853343
7	0.463515	0.575604	0.779013
8	0.444595	0.589347	0.795798
9	0.484496	0.557335	0.712729
10	0.476143	0.580497	0.739847
11	0.476234	0.618777	0.815671
12	0.491864	0.548658	0.795864
13	0.476169	0.607448	0.801909
14	0.453465	0.598773	0.81
15	0.438055	0.571096	0.800482
16	0.446183	0.604353	0.822222
17	0.472092	0.639987	0.852376
Galactose concentration:	320 uM
Copper concentration	0 uM
Competition: K1 vs K2
Shown are K1 frequencies
Replica / Time	14 h	26 h	38 h
1	0.465366	0.504745	0.583005
2	0.459411	0.549965	0.750475
3	0.467199	0.556522	0.721282
4	0.479758	0.499863	0.545026
5	0.456395	0.541558	0.727273
6	0.452489	0.517275	0.663162
7	0.465385	0.48532	0.570846
8	0.474108	0.469231	0.482326
9	0.461675	0.473363	0.537287
10	0.467913	0.522832	0.640723
11	0.455739	0.50393	0.622657
12	0.475011	0.515528	0.624204
13	0.473102	0.529944	0.616963
14	0.480759	0.524586	0.637727
15	0.490361	0.52286	0.663945
16	0.46994	0.525333	0.625446
17	0.480112	0.521985	0.644307
18	0.485899	0.524665	0.637211
Galactose concentration:	280 uM
Copper concentration	0 uM
Competition: K1 vs K2
Shown are K1 frequencies
Replica / Time	14 h	26 h	38 h
1	0.48227	0.464822	0.436402
2	0.470846	0.493796	0.513856
3	0.474545	0.451071	0.519721
4	0.482683	0.465753	0.482748
5	0.482846	0.472045	0.481445
6	0.482206	0.464294	0.436603
7	0.442978	0.46642	0.453905
8	0.457368	0.462058	0.448109
9	0.451131	0.465803	0.488357
10	0.450063	0.448974	0.442716
11	0.48233	0.456857	0.4369
12	0.474576	0.464081	0.44116
13	0.463174	0.468299	0.457835
14	0.483218	0.4756	0.466988
15	0.473313	0.461203	0.479234
16	0.452991	0.464043	0.451622
Galactose concentration:	240 uM
Copper concentration	0 uM
Competition: K1 vs K2
Shown are K1 frequencies
Replica / Time	14 h	26 h	38 h
1	0.475081	0.453862	0.352889
2	0.452005	0.442035	0.356736
3	0.457401	0.452762	0.363777
4	0.467005	0.45292	0.344078
5	0.469481	0.438439	0.387147
6	0.491746	0.436175	0.360076
7	0.453361	0.429088	0.373293
8	0.477533	0.437555	0.37281
9	0.451034	0.434085	0.355024
10	0.440743	0.433507	0.35284
11	0.479733	0.401325	0.371079
12	0.45528	0.43446	0.320249
13	0.481934	0.445863	0.332282
14	0.472821	0.424034	0.357623
15	0.472709	0.428088	0.339295
16	0.485885	0.442173	0.356509
17	0.455427	0.443932	0.328749
Galactose concentration:	200 uM
Copper concentration	0 uM
Competition: K1 vs K2
Shown are K1 frequencies
Replica / Time	14 h	26 h	38 h
1	0.444018	0.436391	0.333729
2	0.437658	0.447168	0.330964
3	0.435392	0.440269	0.333245
4	0.473733	0.452949	0.342555
5	0.459759	0.437385	0.332443
6	0.467968	0.423192	0.3207
7	0.469897	0.444148	0.331236
8	0.457051	0.448605	0.322858
9	0.46384	0.437912	0.325049
10	0.466667	0.44496	0.317966
11	0.481945	0.454586	0.323636
12	0.4866	0.434571	0.328244
13	0.472016	0.439464	0.311198
Galactose concentration:	0 uM
Copper concentration	0 uM
Competition: K1 vs K2
Shown are K1 frequencies
Replica / Time	14 h	26 h	38 h
1	0.47588	0.461123	0.322791
2	0.443354	0.437141	0.331189
3	0.438785	0.429506	0.326806
4	0.451035	0.422587	0.313996
5	0.470071	0.440718	0.353448
6	0.467962	0.429633	0.326875
7	0.465525	0.428458	0.30891
8	0.43991	0.437632	0.32579
9	0.47363	0.443589	0.337125
10	0.472984	0.432504	0.323286
11	0.461538	0.423358	0.291891
12	0.466395	0.442423	0.317444
13	0.45651	0.44025	0.293949
14	0.451879	0.427259	0.293125
15	0.473565	0.442308	0.307183
16	0.461991	0.435401	0.291536
Galactose concentration:	0 uM
Copper concentration	12.5 uM
Competition: K1 vs K2
Shown are K1 frequencies
Replica / Time	14 h	26 h	38 h
1	0.492428	0.373796	0.206532
2	0.468348	0.3932	0.193396
3	0.46612	0.388441	0.192938
4	0.451132	0.391525	0.192964
5	0.477321	0.372265	0.193427
6	0.462992	0.383415	0.207466
7	0.466756	0.369819	0.189373
8	0.450824	0.374412	0.192537
9	0.449384	0.35914	0.169419
10	0.460126	0.370534	0.180335
11	0.467005	0.358263	0.173531
12	0.490187	0.38786	0.188451
13	0.449476	0.34855	0.173384
14	0.476944	0.385779	0.182031
Galactose concentration:	0 uM
Copper concentration	25 uM copper
Competition: K1 vs K2
Shown are K1 frequencies
Replica / Time	14 h	26 h	38 h
1	0.468468	0.34607	0.15525
2	0.456094	0.349028	0.146334
3	0.460181	0.355314	0.15754
4	0.467194	0.356127	0.15592
5	0.457463	0.338589	0.148584
6	0.443182	0.364356	0.158491
7	0.452049	0.357843	0.136848
8	0.486098	0.374293	0.1559
9	0.470617	0.357261	0.16034
10	0.461226	0.362759	0.158389
11	0.455307	0.339971	0.132884
12	0.46261	0.340888	0.129815
13	0.478842	0.349211	0.145571
14	0.465885	0.360648	0.134676
15	0.461355	0.337209	0.13993
16	0.478528	0.348115	0.145646
17	0.46078	0.340009	0.133727
Galactose concentration:	0 uM
Copper concentration	50 uM copper
Competition: K1 vs K2
Shown are K1 frequencies
Replica / Time	14 h	26 h	38 h
1	0.447053	0.339389	0.138809
2	0.492162	0.339155	0.143616
3	0.483375	0.330982	0.13442
4	0.447221	0.325906	0.119528
5	0.482655	0.346348	0.134198
6	0.475862	0.330428	0.13411
7	0.455206	0.335119	0.151625
8	0.474701	0.338149	0.135949
9	0.458208	0.330555	0.128896
10	0.4645	0.309437	0.111733
11	0.465899	0.323896	0.111436
12	0.459087	0.313611	0.110218
13	0.459511	0.338571	0.11425
14	0.477098	0.33133	0.0809881
15	0.441893	0.323712	0.124557
16	0.490057	0.323853	0.122715

## Sheet: Fig. 3 panel B
Competition experiments initialized with different initial frequency for the two strains
Galactose concentration:	0 uM
Copper concentration	50 uM
Competition: K1 vs K2
Replica:	1	2	3	4
K1 frequency at 14 h	0.471998	0.477698	0.47327	0.467067
K1 frequency at 38 h	0.153082	0.139856	0.156647	0.148358
K1 frequency at 14 h	0.679065	0.67482	0.672944	0.676412
K1 frequency at 38 h	0.495062	0.501689	0.474311	0.483159
K1 frequency at 14 h	0.896299	0.899726	0.904741	0.91041
K1 frequency at 38 h	0.889258	0.897022	0.89199	0.891183
K1 frequency at 14 h	0.951212	0.957132	0.956404	0.9524
K1 frequency at 38 h	0.949198	0.956272	0.947435	0.950767
K1 frequency at 14 h	0.57251	0.569106	0.579191	0.561919
K1 frequency at 38 h	0.287527	0.293417	0.275053	0.261022
K1 frequency at 14 h	0.765169	0.781291	0.767549	0.76048
K1 frequency at 38 h	0.676812	0.695024	0.671774	0.667525
K1 frequency at 14 h	0.9008	0.906475	0.906644	0.906823
K1 frequency at 38 h	0.899837	0.899857	0.894874	0.894343
K1 frequency at 14 h	0.98965	0.991767	0.991882	0.99176
K1 frequency at 38 h	0.990438	0.991819	0.9915	0.991999
Galactose concentration:	200 uM
Copper concentration	0 uM
Competition: K1 vs K2
Replica:	1	2	3	4
K1 frequency at 14 h	0.254666	0.210025	0.226208	0.222318
K1 frequency at 38 h	0.102658	0.0767548	0.099224	0.119209
K1 frequency at 14 h	0.374228	0.391103	0.357031	0.397032
K1 frequency at 38 h	0.221887	0.243121	0.222469	0.209739
K1 frequency at 14 h	0.529991	0.562358	0.531293	0.526481
K1 frequency at 38 h	0.443381	0.486283	0.43495	0.448238
K1 frequency at 14 h	0.703431	0.688266	0.710398	0.682396
K1 frequency at 38 h	0.674813	0.679114	0.669592	0.680301
K1 frequency at 14 h	0.285149	0.285588	0.30641	0.282785
K1 frequency at 38 h	0.153414	0.161972	0.139858	0.170257
K1 frequency at 14 h	0.45054	0.466344	0.464091	0.458187
K1 frequency at 38 h	0.318592	0.338558	0.329867	0.347511
K1 frequency at 14 h	0.619957	0.620903	0.612069	0.603756
K1 frequency at 38 h	0.572562	0.54676	0.561057	0.54815
K1 frequency at 14 h	0.773885	0.770246	0.769433	0.768811
K1 frequency at 38 h	0.776708	0.777285	0.812558	0.775955
Galactose concentration:	280 uM
Copper concentration	0 uM
Competition: K1 vs K2
Replica:	1	2	3	4
K1 frequency at 14 h	0.184579	0.175636	0.169532	NA
K1 frequency at 38 h	0.0959464	0.0854554	0.0806284	NA
K1 frequency at 14 h	0.380538	0.377843	0.379753	0.371842
K1 frequency at 38 h	0.328709	0.318955	0.26603	0.274528
K1 frequency at 14 h	0.578285	0.575819	0.572693	0.571935
K1 frequency at 38 h	0.666239	0.637407	0.648078	0.615012
K1 frequency at 14 h	0.757944	0.767274	0.771534	0.765058
K1 frequency at 38 h	0.909418	0.917189	0.890534	0.890875
K1 frequency at 14 h	0.258959	0.268706	0.260748	0.260067
K1 frequency at 38 h	0.162565	0.18126	0.162952	0.15636
K1 frequency at 14 h	0.468909	0.463295	0.470451	0.477649
K1 frequency at 38 h	0.495868	0.48137	0.474479	0.494843
K1 frequency at 14 h	0.670846	0.684784	0.675799	0.673643
K1 frequency at 38 h	0.819579	0.820809	0.821779	0.784179
K1 frequency at 14 h	0.902937	0.90647	0.905267	0.9083
K1 frequency at 38 h	0.982495	0.974657	0.966223	0.969361
Galactose concentration:	320 uM
Copper concentration	0 uM
Competition: K1 vs K2
Replica:	1	2	3	4
K1 frequency at 14 h	0.179821	0.168184	0.174113	0.180071
K1 frequency at 38 h	0.0921174	0.0884294	0.0935282	0.0983367
K1 frequency at 14 h	0.374887	0.380411	0.368939	0.379346
K1 frequency at 38 h	0.403906	0.419194	0.392492	0.376123
K1 frequency at 14 h	0.583016	0.572784	0.576344	0.586084
K1 frequency at 38 h	0.838975	0.826057	0.777461	0.843564
K1 frequency at 14 h	0.774522	0.764273	0.76824	0.767786
K1 frequency at 38 h	0.961354	0.960282	0.964459	0.942612
K1 frequency at 14 h	0.270525	0.255847	0.264658	0.248696
K1 frequency at 38 h	0.187899	0.181159	0.175485	0.177585
K1 frequency at 14 h	0.46225	0.483074	0.477108	0.473158
K1 frequency at 38 h	0.655762	0.645562	0.646651	0.679736
K1 frequency at 14 h	0.677039	0.68412	0.67927	0.676629
K1 frequency at 38 h	0.939144	0.928447	0.930026	0.913546
K1 frequency at 14 h	0.906088	0.905548	0.900576	0.904884
K1 frequency at 38 h	0.989654	0.990425	0.993741	0.99048
Galactose concentration:	360 uM
Copper concentration	0 uM
Competition: K1 vs K2
Replica:	1	2	3	4
K1 frequency at 14 h	0.0106412	0.0129366	0.0128498	0.0117912
K1 frequency at 38 h	0.00516311	0.0042995	0.00351782	0.0045137
K1 frequency at 14 h	0.11163	0.102802	0.10686	0.109743
K1 frequency at 38 h	0.047486	0.0533425	0.0422954	0.0475595
K1 frequency at 14 h	0.263726	0.263129	0.260587	0.272645
K1 frequency at 38 h	0.24051	0.222593	0.219812	0.259387
K1 frequency at 14 h	0.473618	0.466653	0.470722	NA
K1 frequency at 38 h	0.815926	0.810772	0.84702	NA
K1 frequency at 14 h	0.0526644	0.0563802	0.0582808	0.0504947
K1 frequency at 38 h	0.0230935	0.0259373	0.0208311	0.0191809
K1 frequency at 14 h	0.177522	0.168589	0.190818	0.177029
K1 frequency at 38 h	0.1	0.0928726	0.107253	0.113437
K1 frequency at 14 h	0.37245	0.369501	0.380062	0.36587
K1 frequency at 38 h	0.594033	0.476491	0.52575	0.528853
K1 frequency at 14 h	0.570418	0.584536	0.571972	0.586256
K1 frequency at 38 h	0.919669	0.95589	0.937641	0.946659

## Sheet: Fig. 3 panel D
Competition experiments initialized with same initial frequency for the two strains
Competition: K1 vs K2
Replica	Galactose concentration (uM)	14 h	38 h
1	225	0.50972	0.39198
2	225	0.509105	0.392293
3	225	0.476388	0.371153
4	225	0.500697	0.399607
5	225	0.490003	0.378189
6	225	0.490501	0.408505
7	225	0.489024	0.360876
8	225	0.498768	0.39869
9	225	0.481629	0.372169
10	225	0.486478	0.377653
11	225	0.503151	0.427535
12	225	0.506007	0.459366
13	225	0.500354	0.394096
1	250	0.485936	0.532926
2	250	0.509105	0.392293
3	250	0.493699	0.397225
4	250	0.507958	0.58052
5	250	0.499397	0.483849
6	250	0.493071	0.495538
7	250	0.494347	0.503203
8	250	0.511282	0.478639
9	250	0.488181	0.51785
10	250	0.508752	0.564261
11	250	0.48976	0.51638
12	250	0.485668	0.645399
13	250	0.489403	0.488425
14	250	0.492448	0.572177
1	275	0.506648	0.572055
2	275	0.509963	0.573937
3	275	0.493253	0.638038
4	275	0.492315	0.608808
5	275	0.501114	0.663899
6	275	0.496367	0.623359
7	275	0.487179	0.612999
8	275	0.494816	0.758498
9	275	0.471802	0.669695
10	275	0.496407	0.531559
11	275	0.487316	0.723505
12	275	0.513361	0.778707
13	275	0.489475	0.843428
14	275	0.48776	0.659652
15	275	0.481821	0.692928
1	300	0.49023	0.693087
2	300	0.493048	0.55835
3	300	0.489958	0.701708
4	300	0.504564	0.680213
5	300	0.482459	0.84334
6	300	0.505644	0.743548
7	300	0.496952	0.815626
8	300	0.48094	0.79745
9	300	0.494159	0.820668
10	300	0.487597	0.844163
11	300	0.496137	0.89617
12	300	0.487111	0.731168
13	300	0.488203	0.749601
