# Supplementary material for: Antagonism between killer yeast strains as an experimental model for biological nucleation dynamics
Source: eLife journal article supplement (doi:10.7554/elife.62932), 2021-12-06
Supplement: supp [file elife-62932-supp-v1.zip › elife_poa_e62932_Figure_4_source_data_1.xlsx]

## Sheet: Figure 4-Source data
Experiment	Inducer concentration	Strain	Initial freq	Min estimate	Max estimate
1	12.5 uM Cu	K2	70	0.043056	0.114427
1	12.5 uM Cu	S1	80	0.735206	0.844583
1	12.5 uM Cu	K2	50	0.0134354	0.0827585
1	12.5 uM Cu	K2	60	0.0136563	0.082942
1	12.5 uM Cu	K2	80	0.122069	0.35427
1	12.5 uM Cu	K2	90	0.670684	0.80997
1	12.5 uM Cu	S1	20	0.119709	0.273016
1	12.5 uM Cu	S1	35	0.309576	0.450268
1	12.5 uM Cu	S1	50	0.40303	0.553714
1	12.5 uM Cu	S1	65	0.558464	0.827181
2	12.5 uM Cu	K2	50	0.0167587	0.046333
2	12.5 uM Cu	K2	60	0.020853	0.0510578
2	12.5 uM Cu	K2	70	0.0304844	0.158035
2	12.5 uM Cu	K2	80	0.114153	0.219813
2	12.5 uM Cu	K2	90	0.59801	0.743812
2	12.5 uM Cu	S1	20	0.168555	0.253821
2	12.5 uM Cu	S1	35	0.203453	0.499077
2	12.5 uM Cu	S1	50	0.266723	0.625937
2	12.5 uM Cu	S1	65	0.453346	0.749078
2	12.5 uM Cu	S1	80	0.707607	0.82215
1	250 uM Gal	K1	20	0.0237346	0.0762955
1	250 uM Gal	K1	35	0.0387105	0.119661
1	250 uM Gal	K1	50	0.0681887	0.203676
1	250 uM Gal	K1	65	0.641384	0.810456
1	250 uM Gal	K1	80	0.916189	0.968127
2	250 uM Gal	K1	20	0.0205129	0.0844397
2	250 uM Gal	K1	35	0.0546945	0.129914
2	250 uM Gal	K1	50	0.0503187	0.281923
2	250 uM Gal	K1	65	0.625735	0.823696
2	250 uM Gal	K1	80	0.917286	0.97483
1	270 uM Gal	K1	20	0.0144844	0.0619215
1	270 uM Gal	K1	35	0.0298361	0.165152
1	270 uM Gal	K1	50	0.211396	0.294432
1	270 uM Gal	K1	65	0.861981	0.91766
1	270 uM Gal	K1	80	0.965874	0.990039
2	270 uM Gal	K1	20	0.01652	0.0465858
2	270 uM Gal	K1	35	0.0358664	0.110523
2	270 uM Gal	K1	50	0.1946	0.302705
2	270 uM Gal	K1	65	0.802659	0.943792
2	270 uM Gal	K1	80	0.975984	0.993031
1	300 uM Gal	K1	20	0.0243526	0.0496366
1	300 uM Gal	K1	35	0.0301282	0.136073
1	300 uM Gal	K1	50	0.529992	0.644489
1	300 uM Gal	K1	65	0.952068	0.988443
1	300 uM Gal	K1	80	0.904401	0.983681
2	300 uM Gal	K1	20	0.0112751	0.0593409
2	300 uM Gal	K1	35	0.0334514	0.106778
2	300 uM Gal	K1	50	0.359296	0.615851
2	300 uM Gal	K1	65	0.966988	0.98937
2	300 uM Gal	K1	80	0.90842	0.962465
1	350 uM Gal	K1	10	0.0132555	0.0465395
1	350 uM Gal	K1	20	0.0282315	0.0825519
1	350 uM Gal	K1	30	0.0137667	0.0613196
1	350 uM Gal	K1	40	0.0569954	0.321665
1	350 uM Gal	K1	50	0.860896	0.95529
1	350 uM Gal	S1	20	0.14953	0.368145
1	350 uM Gal	S1	35	0.163763	0.439907
1	350 uM Gal	S1	50	0.327399	0.665058
1	350 uM Gal	S1	65	0.583445	0.769589
1	350 uM Gal	S1	80	0.736015	0.869331
2	350 uM Gal	K1	10	0.0182119	0.0500658
2	350 uM Gal	K1	20	0.0444879	0.123558
2	350 uM Gal	K1	30	0.0155601	0.0607372
2	350 uM Gal	K1	40	0.160543	0.246539
2	350 uM Gal	K1	50	0.908727	0.974162
2	350 uM Gal	S1	20	0.132048	0.269114
2	350 uM Gal	S1	35	0.287016	0.401618
2	350 uM Gal	S1	50	0.472019	0.623092
2	350 uM Gal	S1	50	0.281178	0.647876
2	350 uM Gal	S1	65	0.577443	0.690798
2	350 uM Gal	S1	80	0.741493	0.84599
