# Supplementary material for: Antagonism between killer yeast strains as an experimental model for biological nucleation dynamics
Source: eLife journal article supplement (doi:10.7554/elife.62932), 2021-12-06
Supplement: supp [file elife-62932-supp-v1.zip › elife_poa_e62932_Figure_5_figure_supplement_5.pdf]

Transfer 1

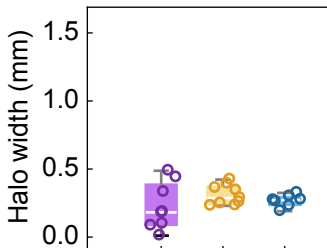

Transfer 2

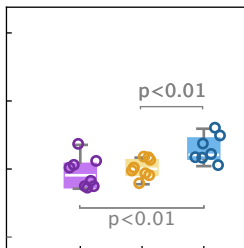

Transfer 3

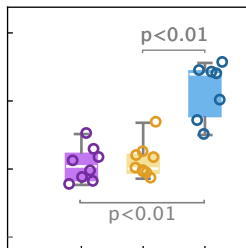

Transfer 4

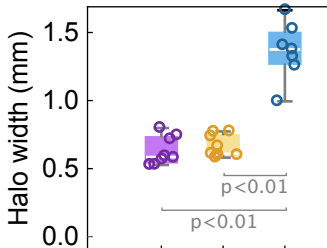

Transfer 5

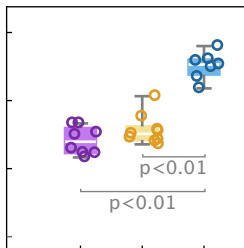

Transfer 6

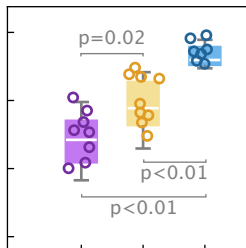

280  $\mu\text{M}$  Gal  
360  $\mu\text{M}$  Gal  
360  $\mu\text{M}$  Gal / 12.5  $\mu\text{M}$  Cu

280  $\mu\text{M}$  Gal  
360  $\mu\text{M}$  Gal  
360  $\mu\text{M}$  Gal / 12.5  $\mu\text{M}$  Cu

280  $\mu\text{M}$  Gal  
360  $\mu\text{M}$  Gal  
360  $\mu\text{M}$  Gal / 12.5  $\mu\text{M}$  Cu
