# Supplementary material for: Antagonism between killer yeast strains as an experimental model for biological nucleation dynamics
Source: eLife journal article supplement (doi:10.7554/elife.62932), 2021-12-06
Supplement: supp [file elife-62932-supp-v1.zip › elife_poa_e62932_Figure_5_source_data_1.xlsx]

## Sheet: Figure 5-Source data
Experiment:	1	1	1	1	1	1	1	1	1	1	1	1	1	1	1	1	1	1	1	1	1	2	2	2	2	2	2	2	2	2	2	2	2	2	2	2	2	2	2	2	2	2
Replica:	1	2	3	4	5	6	7	8	9	10	11	12	13	14	15	16	17	18	19	20	21	22	23	24	25	26	27	28	29	30	31	32	33	34	35	36	37	38	39	40	41	42
Initial fluorescence intensity of K1 (arbitrary units)	2060.57	2311.05	2145.14	3894.71	4487.71	3664.13	3125.24	3599.62	6777.13	4210.85	6156.47	5702.43	6868.93	6269.47	7066.13	6667	4730.72	5894.64	5098.36	7651.16	8086.52	2101.63	2297.37	3213.01	2367.86	2410.2	3450.85	3275.14	4806.12	2359.27	5667.72	3714.56	3421.83	4641.22	4987.75	5756.25	5140.26	5088.05	3746.98	4492.94	6278.95	5920.37
Transfer	Area (mm^2)	Area (mm^2)	Area (mm^2)	Area (mm^2)	Area (mm^2)	Area (mm^2)	Area (mm^2)	Area (mm^2)	Area (mm^2)	Area (mm^2)	Area (mm^2)	Area (mm^2)	Area (mm^2)	Area (mm^2)	Area (mm^2)	Area (mm^2)	Area (mm^2)	Area (mm^2)	Area (mm^2)	Area (mm^2)	Area (mm^2)	Area (mm^2)	Area (mm^2)	Area (mm^2)	Area (mm^2)	Area (mm^2)	Area (mm^2)	Area (mm^2)	Area (mm^2)	Area (mm^2)	Area (mm^2)	Area (mm^2)	Area (mm^2)	Area (mm^2)	Area (mm^2)	Area (mm^2)	Area (mm^2)	Area (mm^2)	Area (mm^2)	Area (mm^2)	Area (mm^2)	Area (mm^2)
0	2.41337	6.16433	3.15566	15.248	17.5051	16.3439	16.8093	19.5721	25.9833	25.2656	23.0304	26.1046	25.3342	35.2424	32.9335	36.6679	33.4484	33.0697	33.9198	31.3582	34.4452	2.68556	4.68049	12.3015	9.61067	8.56121	16.4412	15.7485	26.6626	5.8633	26.9008	21.0664	25.8851	28.1989	25.7491	28.317	33.6051	33.8216	27.667	34.8548	35.2621	32.369
1	0.00127955	0.213685	0.011516	13.3181	17.526	13.5328	6.60709	8.22573	25.3469	18.229	22.6811	24.1592	25.6307	29.4484	31.8846	35.2783	26.0768	31.142	25.9396	30.5038	34.1487	0.0048623	0.251816	5.79714	1.13112	0.00127955	9.33408	8.06271	23.2113	0.195771	26.597	11.8167	5.62696	18.3347	22.2563	26.6876	27.0223	26.6743	10.2902	16.4817	32.2654	28.1867
2	0	0	0	12.6041	16.5725	11.6562	6.09502	8.90287	25.9831	17.8162	22.1552	24.0164	24.5469	31.9399	32.3624	35.2189	24.811	29.3258	28.09	28.0104	34.1111	0	0.00127955	6.841	0.30914	0	6.97202	6.65802	23.8874	0.00307092	26.357	11.429	5.71525	19.6532	22.6053	25.4362	26.2907	27.3228	12.6676	18.7475	30.7934	27.8635
3	0	0	0	9.86586	13.9543	8.17301	5.13715	7.27553	25.6804	15.9366	19.4635	23.1937	23.7485	31.3429	32.2877	35.2222	21.1559	26.3611	25.1258	27.0912	30.5424	0	0	6.52674	0.0870095	0	6.43487	5.76464	20.1222	0.0133073	26.6976	10.1632	5.29683	17.1933	17.7351	25.6115	21.7324	24.6554	11.4894	16.8517	31.8967	27.0876
4	0	0	0	9.73816	13.3619	7.18673	5.74826	7.24098	24.6168	15.8992	18.8291	23.0086	22.9301	31.0742	31.542	35.2934	21.2851	25.6443	25.634	26.6029	30.5048	0	0	6.64523	0.0161224	0	3.93104	5.16581	19.9789	0	26.2753	9.34457	5.21699	17.3103	18.6262	24.8563	21.8681	24.5257	12.1317	17.7087	30.7489	25.2156
5	0	0	0	9.51859	13.5325	6.4126	6.01697	5.87749	23.5793	14.5214	18.661	24.0162	20.6875	29.0072	29.0799	34.6137	20.3979	26.3247	26.4627	21.465	29.571	0	0	4.19463	0	0	6.04563	5.14226	18.4171	0	25.589	7.3541	6.31894	17.8234	18.5888	26.422	20.1683	22.3916	11.0402	18.8458	32.6199	25.8577
6	0	0	0	8.60601	13.5937	5.82887	4.92704	5.44526	23.2681	15.1908	17.5672	23.9673	19.7059	31.0233	28.3103	32.4302	21.1983	24.5538	26.5039	21.4957	29.6582	0	0	3.81793	0	0	6.41286	5.39254	19.0594	0	20.557	7.71237	5.52152	16.5612	17.6123	26.1991	20.8582	21.3803	11.7857	17.2629	32.4909	24.3358
7	0	0	0	9.64603	13.8112	5.94813	6.11037	5.3516	23.0104	16.9075	17.9562	25.8037	19.5362	35.1017	31.1658	34.2482	22.7479	25.4076	28.2159	23.3892	30.0288	0	0	6.82948	0	0	8.60038	6.69641	21.0763	0	25.0119	8.65643	5.82862	17.7172	18.674	27.8727	22.535	26.5658	13.4609	20.7625	34.2557	26.0755
8	0	0	0	10.4946	14.2033	6.90446	6.71995	5.04988	24.0758	17.7103	18.0929	27.0016	19.9991	37.7048	33.6179	35.6465	24.0617	25.9795	29.6076	25.1176	28.7835	0	0	8.48932	0	0	10.7554	7.28398	23.1962	0	28.8895	9.54751	7.72568	19.1987	20.0022	29.0689	23.9809	30.1452	15.1151	22.4536	37.8811	28.9524
9	0	0	0	12.0022	16.0504	8.49469	6.63089	4.38221	25.0462	18.7634	19.4169	28.5767	22.677	39.7785	35.1626	37.3419	22.3031	26.8486	31.3457	27.406	32.68	0	0	8.89673	0	0	11.8302	8.33628	23.9466	0	31.0762	10.2917	8.84708	19.8574	21.3115	29.9026	24.2767	31.9491	16.0717	23.0808	39.554	31.164
10	0	0	0	13.9238	17.7919	8.47703	7.66426	3.85862	23.7649	20.3111	20.7349	31.661	25.4129	41.7106	37.26	39.8757	25.3257	27.915	34.5364	30.007	35.5188	0	0	9.08559	0	0	13.1146	8.72578	26.0148	0	28.1169	10.8035	9.62249	21.0125	23.1581	31.9832	25.9375	33.6095	17.8126	25.4001	41.5703	33.6033
11	0	0	0	14.6273	18.4821	7.84903	7.64942	3.4727	23.9072	20.5693	20.5417	32.5682	25.6335	42.2447	37.0113	42.4891	23.9458	26.0814	35.9613	30.0462	36.8158	0	0	8.71964	0	0	13.4315	7.87667	27.4896	0	32.5362	10.2582	9.61737	21.118	23.3795	32.0326	25.1887	35.4121	19.0663	25.0119	42.6416	33.4344
12	0	0	0	16.8302	20.5962	8.61011	8.87523	3.41947	24.0809	20.9286	22.8397	35.5175	26.9187	45.6009	37.2879	43.5076	23.9916	27.9618	39.7255	31.8043	40.233	0	0.00025591	9.30465	0	0	14.6388	8.68253	27.8154	0	32.9257	10.7431	10.9701	23.3728	26.4473	33.8019	26.2341	37.2869	19.1687	25.9567	45.9034	36.1842
13	0	0	0	17.7533	20.1174	8.47166	8.7872	3.6045	24.2629	22.2025	24.4082	35.3694	27.5782	47.3693	39.0862	45.4458	22.3853	28.566	40.0062	32.6938	42.5612	0	0.00025591	8.60038	0	0	14.6179	9.4692	30.2819	0	36.0509	11.6304	11.5137	24.3673	28.1008	34.1026	25.7303	38.4723	19.9311	25.3571	47.0722	37.2749

## Sheet: Figure 5 supp 2-Source data
Experiment:	1	1	1	1	1	1	1	1	1	1	1	2	2	2	2	2	2	2	2	2	2
Replica:	1	2	3	4	5	6	7	8	9	10	11	12	13	14	15	16	17	18	19	20	21
Initial fluorescence intensity of K1 (arbitrary units)	4999.6	4809.14	5117.51	5087.33	9566.34	8749.5	7393.11	9066.13	10855.1	9694.98	12742	4470.25	5477.43	5296.49	7793.41	6383.84	7020.92	8259.09	10191.6	7030.19	9117.71
Transfer	Area (mm^2)	Area (mm^2)	Area (mm^2)	Area (mm^2)	Area (mm^2)	Area (mm^2)	Area (mm^2)	Area (mm^2)	Area (mm^2)	Area (mm^2)	Area (mm^2)	Area (mm^2)	Area (mm^2)	Area (mm^2)	Area (mm^2)	Area (mm^2)	Area (mm^2)	Area (mm^2)	Area (mm^2)	Area (mm^2)	Area (mm^2)
0	25.8805	25.4291	25.065	25.0772	45.1691	40.2595	33.0445	46.0406	53.1085	45.5978	53.4009	19.2944	25.4012	22.2826	35.4692	27.0184	35.5611	44.582	52.5802	40.7166	47.8005
1	25.5547	25.936	24.7348	25.7425	48.0771	38.3144	31.6704	43.656	53.9393	43.5027	47.0952	18.7557	26.7654	21.3265	34.9039	29.6836	34.9707	42.9638	50.0456	38.8651	47.4235
2	25.6054	25.6088	24.2547	23.963	50.7209	38.2233	30.7971	43.7129	55.7069	42.7007	46.8264	18.2819	27.9356	21.7963	34.1803	30.2302	34.9498	42.9569	51.9416	38.0868	47.6056
3	25.1376	24.1037	23.4347	23.7951	47.2556	37.0558	30.8254	43.006	52.8266	41.3239	45.1559	17.9012	26.2968	21.9505	33.6773	29.1766	34.0566	41.2809	49.6789	36.8253	46.2476
4	29.0914	22.9124	23.8762	28.6405	51.8219	36.9389	30.0096	43.711	55.2531	42.055	51.3456	20.2753	29.108	21.7079	33.547	35.4758	33.8585	45.4267	51.6765	39.3695	50.0945
5	24.7509	24.8215	23.9947	26.867	50.0266	37.052	29.7038	43.4459	54.0061	41.6034	46.3405	18.1809	25.6138	20.8129	34.3624	31.6791	33.5696	41.5473	50.1851	37.041	44.241
6	25.0201	25.3144	24.062	27.3402	47.0627	37.1098	30.3177	43.2353	51.7018	42.0753	45.5142	19.0594	25.4549	20.7914	34.4266	32.2657	33.6834	39.5617	49.5496	37.7619	44.0752
7	25.7226	25.0859	23.8322	27.668	47.9346	37.1764	29.4561	42.5443	53.6347	42.6137	46.0503	19.3253	26.2592	20.2115	35.0792	32.1114	34.3309	39.9113	50.053	38.0488	44.6745
8	25.3978	25.2149	24.3314	27.8546	45.3883	37.2636	29.6715	41.9271	52.4542	42.8182	45.0494	18.414	24.5472	18.6651	35.3274	31.3805	34.6147	40.2568	50.1641	32.6114	43.6737
9	24.422	23.4081	23.762	27.7258	46.9688	36.4457	29.5006	41.0844	53.2296	41.3628	45.5848	16.8404	25.3121	19.5267	33.9821	29.9907	33.3976	39.4261	48.9526	34.0435	43.4464
10	26.9561	25.5862	25.2543	29.3353	48.7276	38.4649	30.2647	42.9551	54.6069	44.1	48.8195	18.543	25.1271	20.06	36.0931	31.2531	36.0104	42.3557	50.6726	33.8631	45.7089
11	27.7353	27.8622	26.7201	29.7189	50.2362	40.429	30.6225	44.3713	57.5668	47.8767	49.4547	19.851	27.3033	20.8864	38.545	33.0979	38.3024	42.3545	53.0303	35.7788	47.6413
12	26.8273	27.733	25.7024	29.6037	48.6903	39.5617	30.6355	41.2461	56.6209	48.0352	49.1548	19.3798	26.3598	20.534	37.8095	33.4408	37.2626	41.6597	53.171	37.0366	46.1176
13	27.634	28.2558	23.7551	29.0169	49.5164	40.6486	30.9071	43.7361	57.5719	49.0488	50.5259	18.4842	27.463	21.7094	37.8622	31.9077	36.5911	43.2721	51.1685	33.0286	47.065
