# Supplementary material for: Antagonism between killer yeast strains as an experimental model for biological nucleation dynamics
Source: eLife journal article supplement (doi:10.7554/elife.62932), 2021-12-06
Supplement: supp [file elife-62932-supp-v1.zip › elife_poa_e62932_Figure_6_source_data_1.xlsx]

## Sheet: K1s vs K2b
Competition in well-mixed liquid cultures
Strain K1s vs K2b
Reported frequencies are those of strain K1s
Replica	12.5 h	25 h	37.5 h
1	0.421053	0.765591	0.940223
2	0.419494	0.782465	0.94919
3	0.439817	0.806497	0.953737
4	0.403903	0.796899	0.951227
5	0.434903	0.809276	0.953459

## Sheet: K1o vs K2b
Competition in well-mixed liquid cultures
Strain K1o vs K2b
Reported frequencies are those of strain K1o
Replica	12.5 h	25 h	37.5 h
1	0.44807	0.604079	0.740876
2	0.44544	0.601818	0.756136
3	0.45	0.593924	0.825623
4	0.448771	0.617562	0.789766
5	0.443526	0.629825	0.743139
6	0.452779	0.637053	0.800624

## Sheet: K1 vs K2bo
Competition in well-mixed liquid cultures
Strain K1 vs K2bo
Reported frequencies are those of strain K1
Replica	12.5 h	25 h	37.5 h
1	0.503715	0.851336	0.932071
2	0.513199	0.847618	0.940018
3	0.498588	0.852177	0.950743
4	0.483264	0.882216	0.963208
5	0.500476	0.892559	0.950469
6	0.509213	0.889312	0.969436

## Sheet: K1 vs K2br
Competition in well-mixed liquid cultures
Strain K1 vs K2br
Reported frequencies are those of strain K1
Replica	12.5 h	25 h	37.5 h
1	0.521236	0.554405	0.52284
2	0.504689	0.547247	0.528816
3	0.530476	0.538119	0.511818
4	0.537155	0.542918	0.526906
5	0.5236	0.531911	0.532059

## Sheet: K1 vs K2b
Competition in well-mixed liquid cultures
Strain K1 vs K2b
Reported frequencies are those of strain K1
Replica	12.5 h	25 h	37.5 h
1	0.496205	0.853534	0.940077
2	0.456221	0.872438	0.963945
3	0.466186	0.891713	0.960959
4	0.488252	0.894599	0.963485
5	0.456907	0.903782	0.975086
6	0.486158	0.899432	0.962264

## Sheet: Fig. 6 supp 1 K1 vs K2bo
Competition in well-mixed liquid cultures
Strain K1 vs K2bo
Reported frequencies are those of strain K1
Replica	12 h	35 h
1	0.0727699	0.0364471
2	0.118294	0.104753
3	0.16332	0.232182
4	0.201521	0.431571
5	0.250779	0.686721
6	0.34488	0.852845
7	0.35426	0.925358
8	0.414931	0.932828
9	0.0606768	0.0400287
10	0.0894526	0.0986687
11	0.158996	0.231781
12	0.152147	0.395635
13	0.264179	0.699169
14	0.276878	0.858425
15	0.345528	0.927301
16	0.461794	0.946387
17	0.0752941	0.0390426
18	0.138934	0.0978829
19	0.193789	0.389515
20	0.262391	0.682592
21	0.378284	0.851341
22	0.375867	0.917699
23	0.303571	0.933718

## Sheet: Fig. 6 supp 1 K1o vs K2b
Competition in well-mixed liquid cultures
Strain K1o vs K2b
Reported frequencies are those of strain K1o
Replica	12 h	35 h
1	0.0354796	0.0458716
2	0.073857	0.0781351
3	0.123871	0.126426
4	0.163522	0.213028
5	0.180272	0.281799
6	0.245723	0.423403
7	0.311334	0.597105
8	0.342105	0.696305
9	0.0640279	0.0331906
10	0.0979592	0.076289
11	0.128429	0.123721
12	0.180622	0.216273
13	0.150602	0.303963
14	0.283513	0.43264
15	0.293578	0.621861
16	0.343173	0.691282
17	0.0510441	0.0358092
18	0.0673077	0.0788027
19	0.133995	0.137765
20	0.202046	0.218427
21	0.212698	0.278411
22	0.217886	0.461358
23	0.285935	0.58303
24	0.346093	0.669429

## Sheet: Fig. 6 supp 1 K1 vs K2b
Competition in well-mixed liquid cultures
Strain K1 vs K2b
Reported frequencies are those of strain K1
Replica	12 h	35 h
1	0.0445487	0.0341463
2	0.105869	0.125426
3	0.181818	0.308215
4	0.21966	0.567275
5	0.286452	0.759144
6	0.304024	0.902144
7	0.390476	0.942144
8	0.40721	0.959072
9	0.0632458	0.0309767
10	0.110849	0.118211
11	0.170799	0.303667
12	0.208281	0.573659
13	0.273292	0.77229
14	0.317411	0.922352
15	0.351485	0.953973
16	0.418863	0.963535
17	0.0727497	0.0307305
18	0.125	0.113175
19	0.153186	0.294662
20	0.210363	0.548204
21	0.261787	0.762963
22	0.329154	0.904221
23	0.405978	0.945338
24	0.414938	0.955609

## Sheet: Fig. 6 supp 2 growth rates
Growth rates on plates
Replica/Strain	K1	K1s	C3R	K2b	K2bo	K2br
1	0.225579	0.307949	0.296108	0.261976	0.302775	0.33638
2	0.303523	0.309054	0.309457	0.275175	0.325583	0.292414
3	0.270476	0.336407	0.325683	0.290206	0.308108	0.296269
4	0.265098	0.334451	0.318454	0.317591	0.314913	0.297556
5	0.29757	0.339338	0.289347	0.302596	0.345695	0.345241
6	0.323868	0.281318	0.327602	0.325786	0.310013	0.284333
7	0.279073	0.286267	0.353102	0.326231	0.299342	0.29482
8	0.272765	0.302775	0.301906	0.277143	0.352166	0.309097
9	0.319127	0.325583	0.323919	0.277851	0.336333	0.290221
10	0.286559	0.345171	0.296825	0.351286	0.362387	0.303785
11	0.335918	0.291335	0.298434	0	0.304988	0.25731
12	0.22992	0.304061	0.323855	0.291934	0.281106	0
13	0.249262	0.0965685	0.328651	0.31255	0.286048	0.331617
14	0.308946	0.348351	0	0.289664	0.333073	0.342296
15	0.314728	0.296662	0.337967	0.332316	0.150622	0.328699
16	0.307356	0	0.312058	0.274936	0.302933	0.29579
17	0.340129	0.304344	0.287375	0.309715	0.325575	0.272315
18	0.336967	0.319068	0.283249	0.297168	0.309417	0.335871
19	0.320041	0.343993	0.30832	0.338854	0.291938	0.298333
20	0.313404	0.309995	0.302618	0.247484		0.308739
21	0.325367	0.283529	0.25574			0.299888
22	0.323693	0.315574	0.310878			0.309455
23	0.373773	0.32693	0.319742
24		0.319429	0.277738

## Sheet: Fig. 6 supp 2 cell counts K1
Number of cells in microcolonies of strain K1
Time (min)	Microcolony 1	Microcolony 2	Microcolony 3	Microcolony 4	Microcolony 5	Microcolony 6	Microcolony 7	Microcolony 8	Microcolony 9	Microcolony 10	Microcolony 11	Microcolony 12	Microcolony 13	Microcolony 14	Microcolony 15	Microcolony 16	Microcolony 17	Microcolony 18	Microcolony 19	Microcolony 20	Microcolony 21	Microcolony 22	Microcolony 23
0	4	4	1	2	4	3	3	3	3	3	3	3	1	3	2	2	2	3	2	3	3	3	3
20	4	5	1	3	4	3	3	4	3	3	3	3	2	3	2	3	2	3	2	3	3	3	3
40	5	5	1	3	5	3	3	5	3	3	3	3	2	3	3	3	2	3	2	3	3	4	3
60	5	5	1	3	5	4	3	5	3	3	5	4	2	4	3	3	2	3	2	3	3	4	4
80	5	5	1	4	5	5	4	5	5	4	5	4	2	4	3	3	3	3	2	3	4	5	5
100	5	7	2	4	6	5	5	7	5	5	5	4	2	4	4	3	3	6	3	4	5	6	6
120	5	7	2	4	6	6	5	7	6	5	5	4	2	5	4	4	4	6	3	5	5	6	6
140	6	7	2	5	8	6	6	8	6	6	5	4	2	5	5	4	4	6	3	5	5	6	6
160	6	7	2	6	8	7	6	9	7	6	5	4	3	6	5	5	5	7	4	6	5	7	7
180	7	8	2	7	8	8	6	9	8	6	9	5	3	7	5	6	5	8	4	6	6	8	9
200	7	10	2	7	8	8	7	10	8	8	9	5	3	7	6	6	6	9	5	8	7	11	10
220	7	12	3	7	11	9	8	10	8	8	10	7	4	9	7	7	6	10	5	8	7	11	11
240	10	13	3	7	11	9	8	11	9	8	11	8	4	10	8	8	7	10	6	9	9	11	12
260	10	14	3	8	13	12	9	13	11	9	13	8	5	10	9	9	8	10	6	9	11	12	14
280	11	16	3	9	15	13	10	15	12	10	13	8	5	10	9	9	9	11	6	10	12	13	14
300	11	19	4	10	16	15	11	17	15	11	14	9	6	12	10	11	9	14	8	12	13	16	18
320	13	21	4	11	17	16	12	18	15	12	17	9	6	13	12	12	9	16	9	13	14	17	21
340	13	21	4	12	22	17	13	18	15	14	18	9	6	15	12	13	12	16	10	14	15	18	23

[truncated: 12 more sheets: Fig. 6 supp 2 cell counts K1s, Fig. 6 supp 2 cell counts K1o, Fig. 6 supp 2 cell counts K2bo, Fig. 6 supp 2 cell counts K2b, Fig. 6 supp 2 cell counts K2br, Fig. 6 supp 3 K2bs vs S1, Fig. 6 supp 3 K2bo vs S1, Fig. 6 supp 3 K2br vs S1, Fig. 6 supp 3 K2b vs S1, Fig. 6 supp 3 K1 vs S2, Fig. 6 supp 3 K1s vs S2, Fig. 6 supp 3 K1o vs S2]
