# Supplementary figures and images for: Antagonism between killer yeast strains as an experimental model for biological nucleation dynamics
Source: eLife journal article supplement (doi:10.7554/elife.62932), 2021-12-06

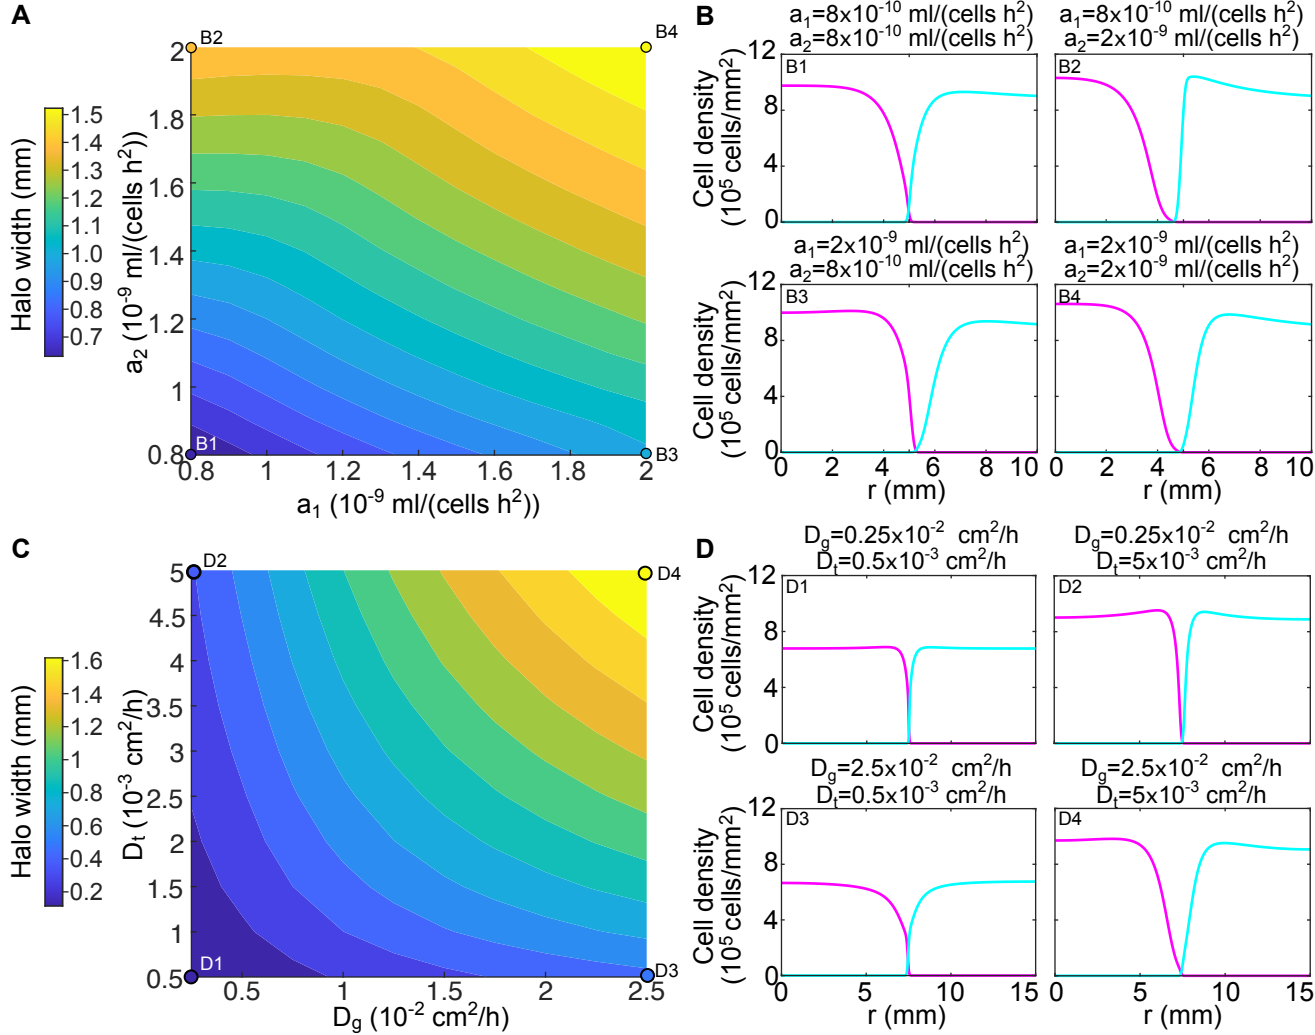

Supplement: supp [file elife-62932-supp-v1.zip]

# Instability crossing

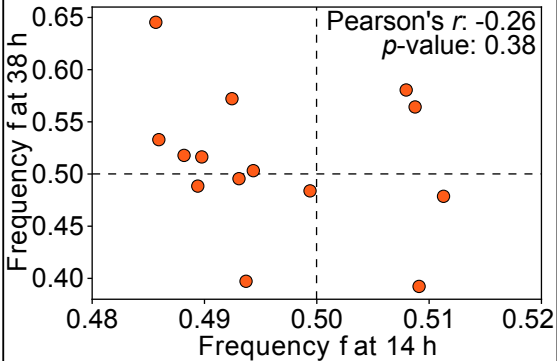

Supplement: supp [file elife-62932-supp-v1.zip]

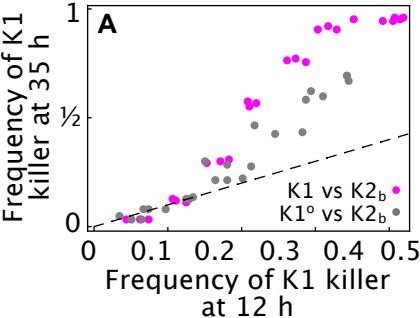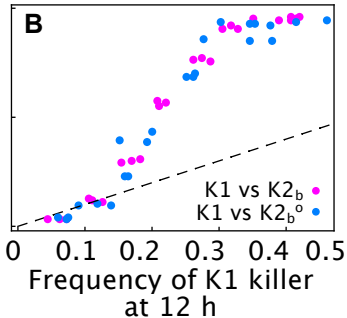

Supplement: supp [file elife-62932-supp-v1.zip]

# Killer vs killer (experiments, model)

## Varying initial frequencies

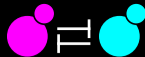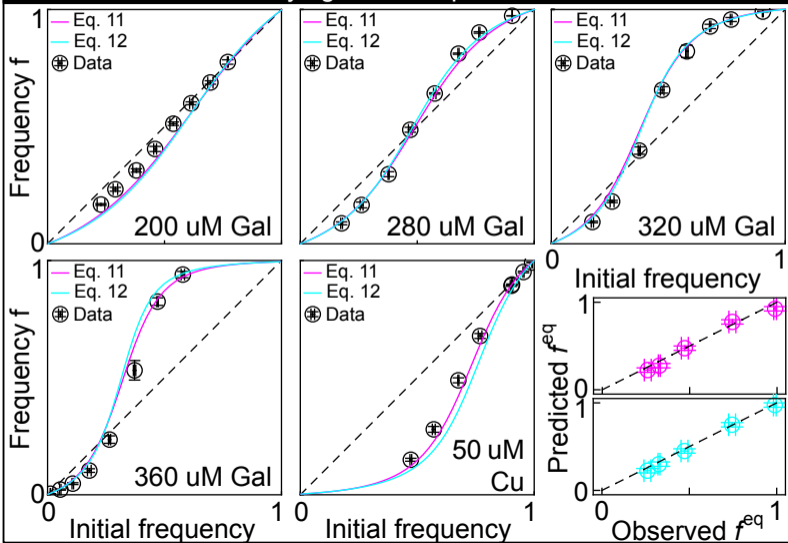

Supplement: supp [file elife-62932-supp-v1.zip › elife_poa_e62932_Figure_3_figure_supplement_1.pdf]

Killer vs killer (experiments)  
Spatially structured

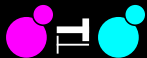

Inoculum size

Transfer

0  
1  
2  
3  
4  
5  
6  
7  
8  
9  
10  
11  
12  
13

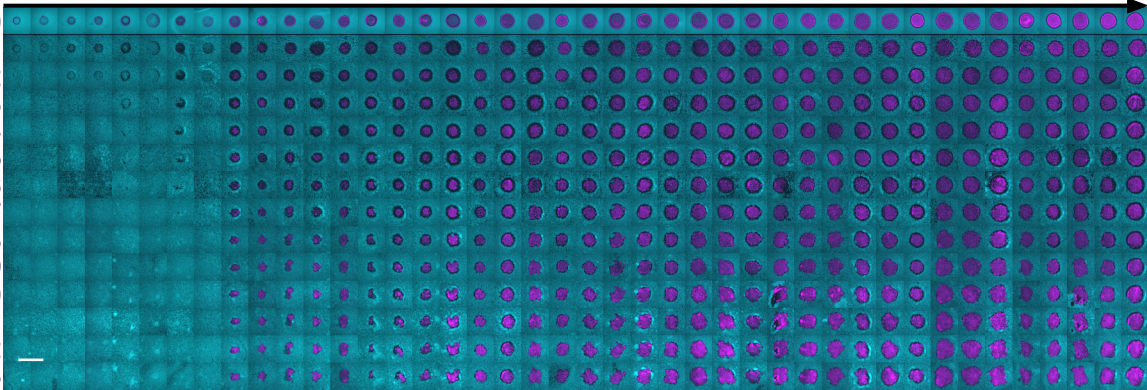

Supplement: supp [file elife-62932-supp-v1.zip › elife_poa_e62932_Figure_5_figure_supplement_1.pdf]

Sensitive vs sensitive (experiments)  
Spatially structured

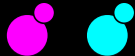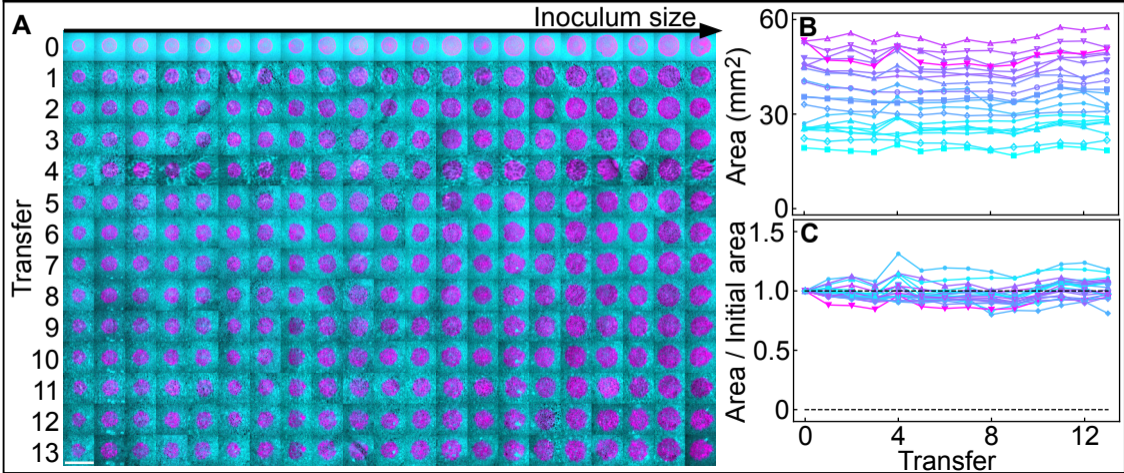

Supplement: supp [file elife-62932-supp-v1.zip › elife_poa_e62932_Figure_5_figure_supplement_2.pdf]

Before replica plating

Immediately after replica plating

48 h after replica plating

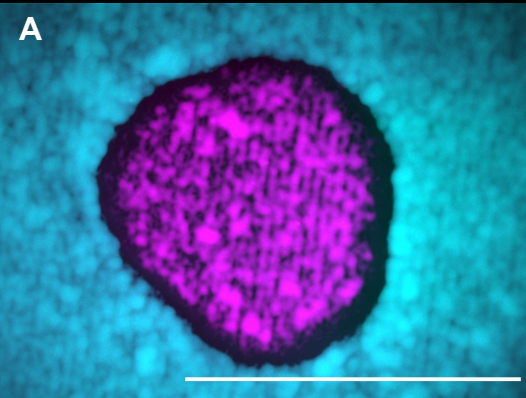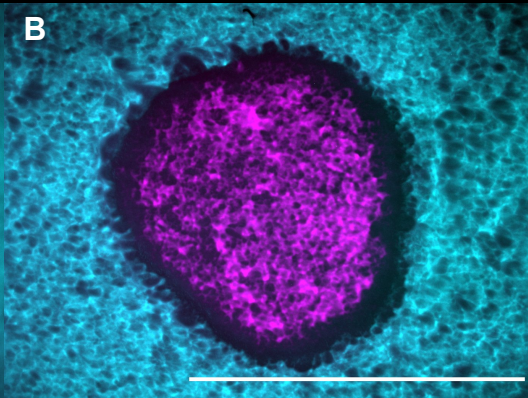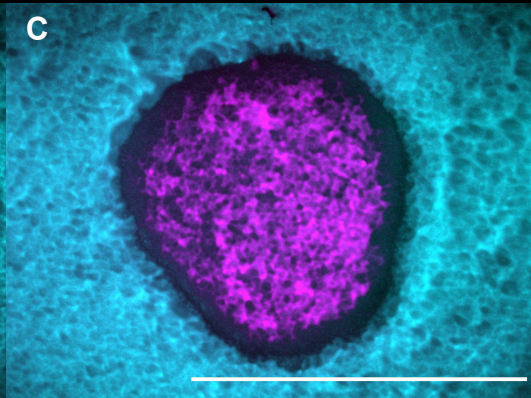

Supplement: supp [file elife-62932-supp-v1.zip › elife_poa_e62932_Figure_5_figure_supplement_3.pdf]

Temperature: 32°C

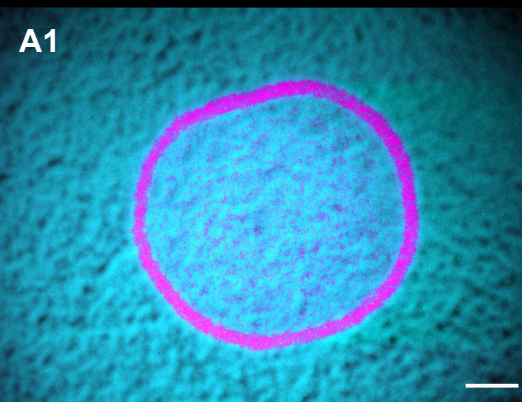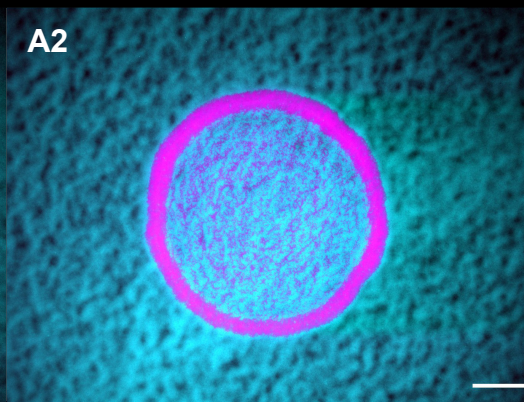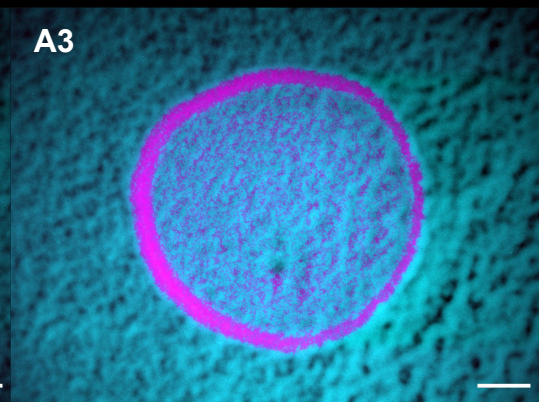

Temperature: 25°C

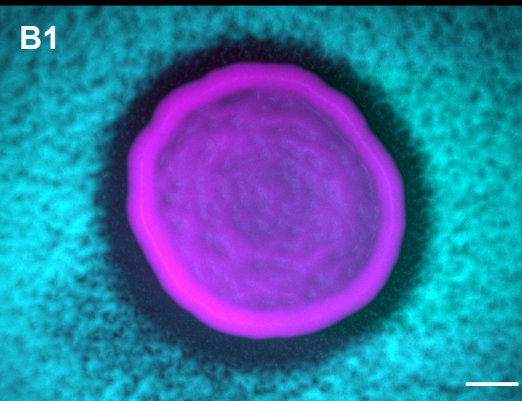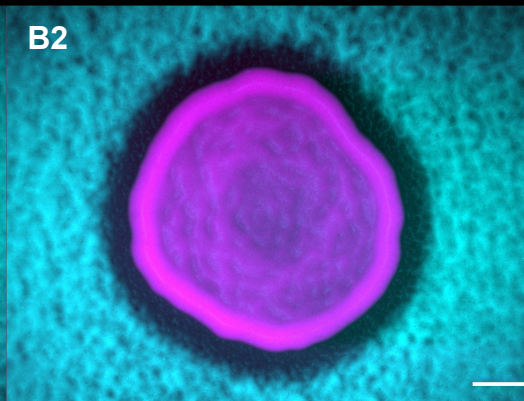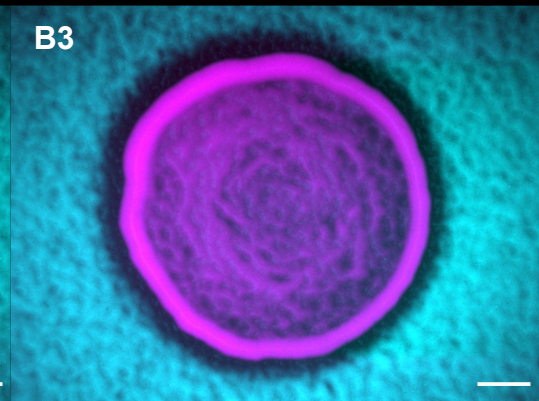

Supplement: supp [file elife-62932-supp-v1.zip › elife_poa_e62932_Figure_5_figure_supplement_4.pdf]

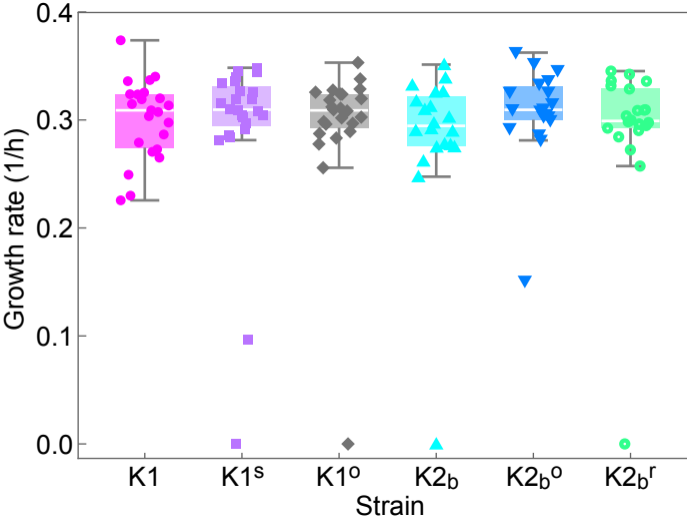

Supplement: supp [file elife-62932-supp-v1.zip › elife_poa_e62932_Figure_6_figure_supplement_2.pdf]

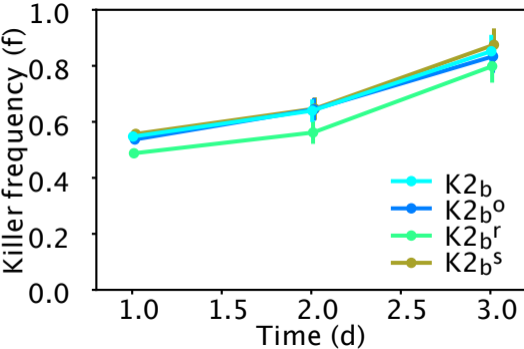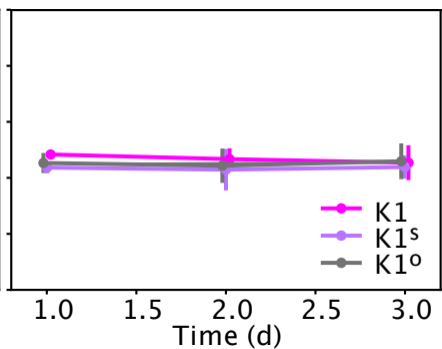

Supplement: supp [file elife-62932-supp-v1.zip › elife_poa_e62932_Figure_6_figure_supplement_3.pdf]

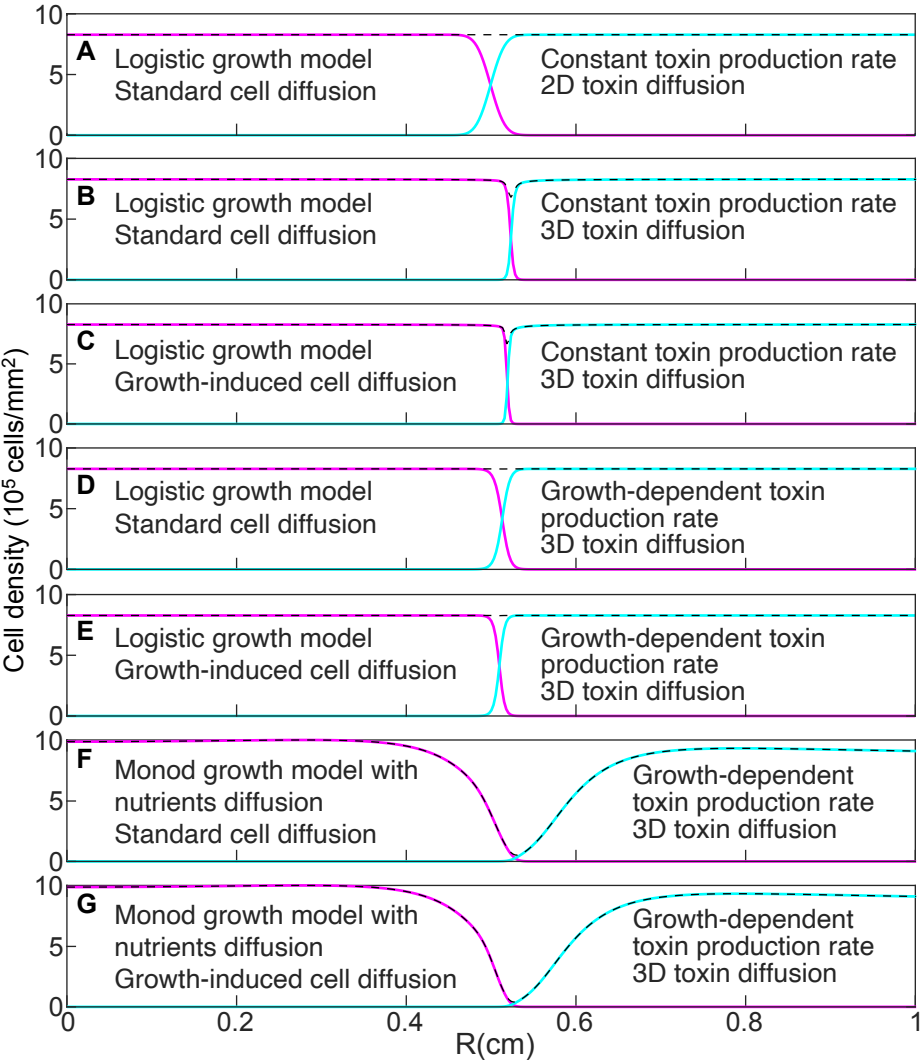

Supplement: supp [file elife-62932-supp-v1.zip › elife_poa_e62932_Figure_7_figure_supplement_1.pdf]

# Killer vs killer (model)

Spatially structured - Idealized initial profile

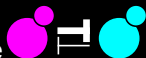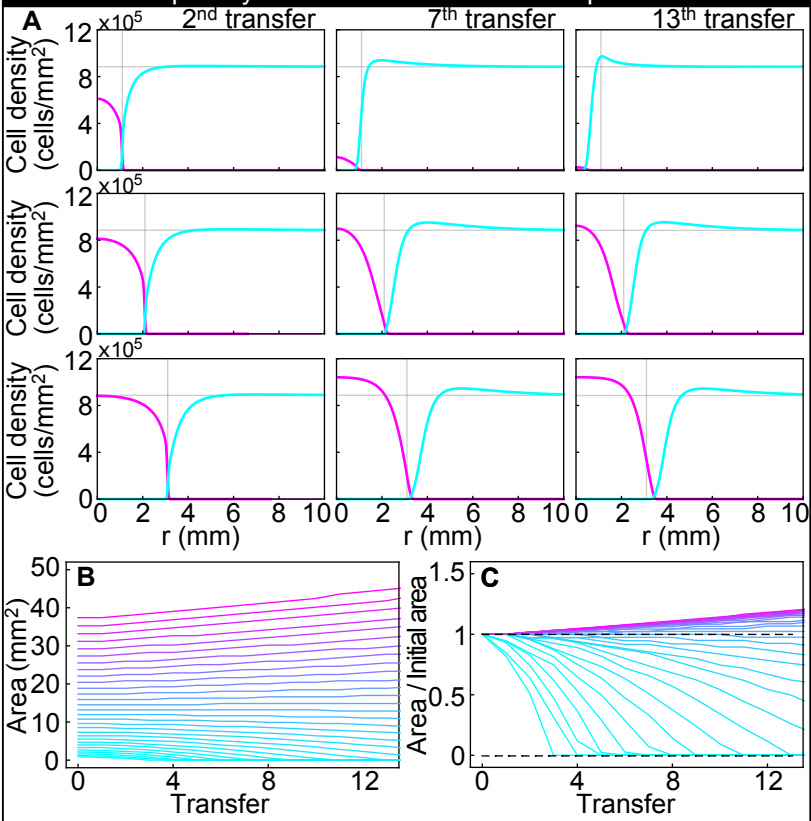

Supplement: supp [file elife-62932-supp-v1.zip › elife_poa_e62932_Figure_7_figure_supplement_2.pdf]

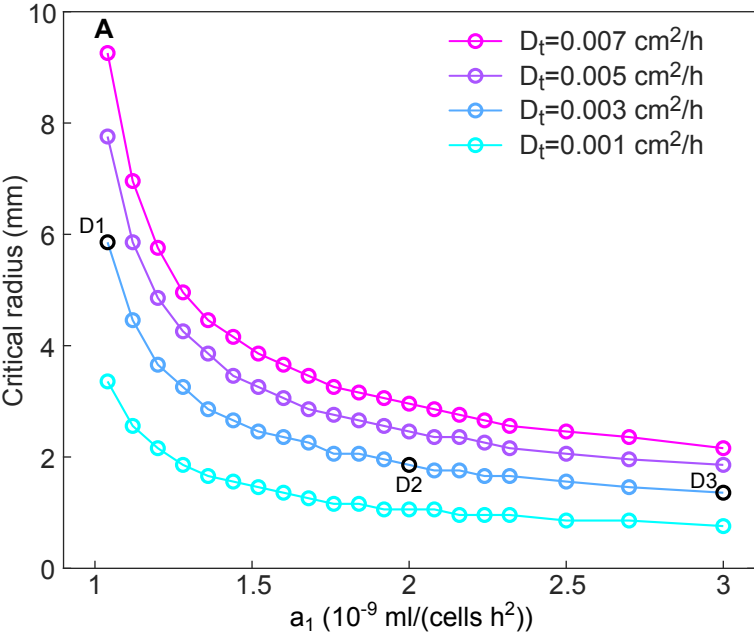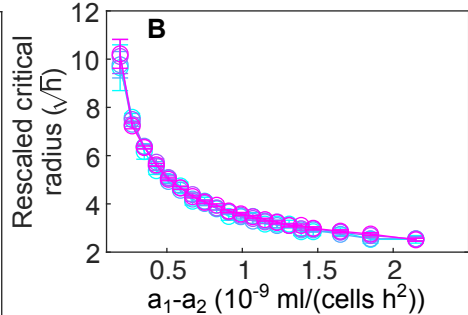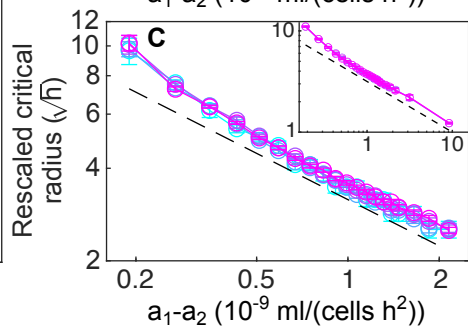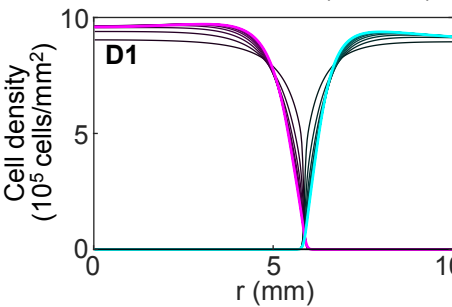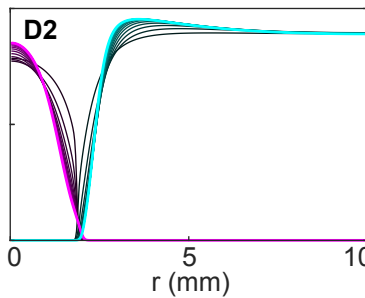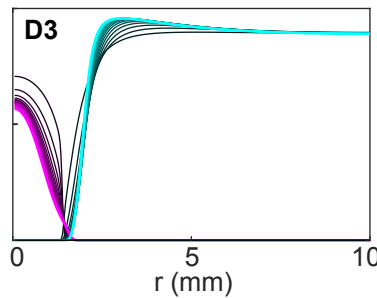

Supplement: supp [file elife-62932-supp-v1.zip › elife_poa_e62932_Figure_7_figure_supplement_3.pdf]
